# Supplementary material for: Microarray analysis of long noncoding RNA and mRNA expression profiles in human macrophages infected with Mycobacterium tuberculosis
Source: PubMed Central journal article supplement (PMC5155227; doi:10.1038/srep38963), 2016-12-14
Supplement: srep38963-s1.pdf [file srep38963-s1.pdf]

# **Microarray analysis of long noncoding RNA and mRNA expression profiles in human macrophages infected with *Mycobacterium tuberculosis***

Xiaofan Yang<sup>1</sup>, Jiahui Yang<sup>1</sup>, Jinli Wang<sup>1</sup>, Qian Wen<sup>1</sup>, Hui Wang<sup>1</sup>, Jianchun He<sup>1</sup>, Shengfeng Hu<sup>1</sup>, Wenting He<sup>1</sup>, Xialin Du<sup>1</sup>, Sudong Liu<sup>1</sup>, Li Ma<sup>1,2\*</sup>

<sup>2\*</sup>

1. Institute of Molecular Immunology, School of Biotechnology, Southern Medical University, Guangzhou 510515, China

2. Guangdong Provincial Key Laboratory of Tropical Disease Research, School of Public Health, Southern Medical University, Guangzhou 510515, China

\* Correspondence:

Li Ma, M.D., Ph.D.

Institute of Molecular Immunology, School of Biotechnology, Southern Medical University, Guangzhou 510515, China

Tel: 86-20-6164-8322, Fax: 86-20-6164-8322

Email: maryhmz@126.com

**Supplementary Table 1. RT-qPCR primers sequences**

| Name   |                              | Sequences               |                         |
|--------|------------------------------|-------------------------|-------------------------|
|        | qPCR primers                 | Forward                 | Reverse                 |
| lncRNA | ENST00000417932              | CATCAACACAGAAACCTCCGC   | CTGACAGAAACGTCAGCCAAG   |
|        | NR_037867<br>(MIR3945HG V1)  | GCTGCTATCGCCAAGATCCA    | GTGACTTGCGGGAGGAGAAT    |
|        | uc003iwy.1<br>(MIR3945HG V2) | ACATTTGCTGACTGGTTCGATG  | GCCTTGAATTGGGACATGAGC   |
|        | ENST00000360485              | CCTCTGGGCAGTGTGATTTG    | ATTGCCATACACCGTGGTCAT   |
|        | uc001zjx.1                   | CATCCTGCTACAACCTCCACAA  | CTGCTACGAACACTCACATACAT |
|        | ENST00000448595              | AACTGGCTGGCTGAATTGGA    | TGTGATGATGCTCTTGGTGTG   |
| mRNA   | GAPDH                        | GAAGACGGGCGGAGAGAAAC    | CGACCAAATCCGTTGACTCC    |
|        | RAP1B                        | GTGACAGCGTGAGAGGTACT    | AAGCATACACTGTTGTGCATC   |
|        | CSF2                         | GGGAGCATGTGAATGCCATC    | GGCTCCTGGAGGTCAAACAT    |
|        | IFIT1                        | AGCCTCCTTGGGTTCGTCTA    | AAAGTCAGCAGCCAGTCTCA    |
|        | MS4A6A                       | GGCTCTCTATCAATCGCCAC    | CAGAGAGAGAGTTCCACTGC    |
|        | FAM198A                      | TGAGGAGGGACATTACTTTGTCA | AAGCCGGTAAAGCTGCCAT     |
|        | PODXL                        | TCCCAGAATGCAACCCAGAC    | GGTGAGTCACTGGATACACCAA  |

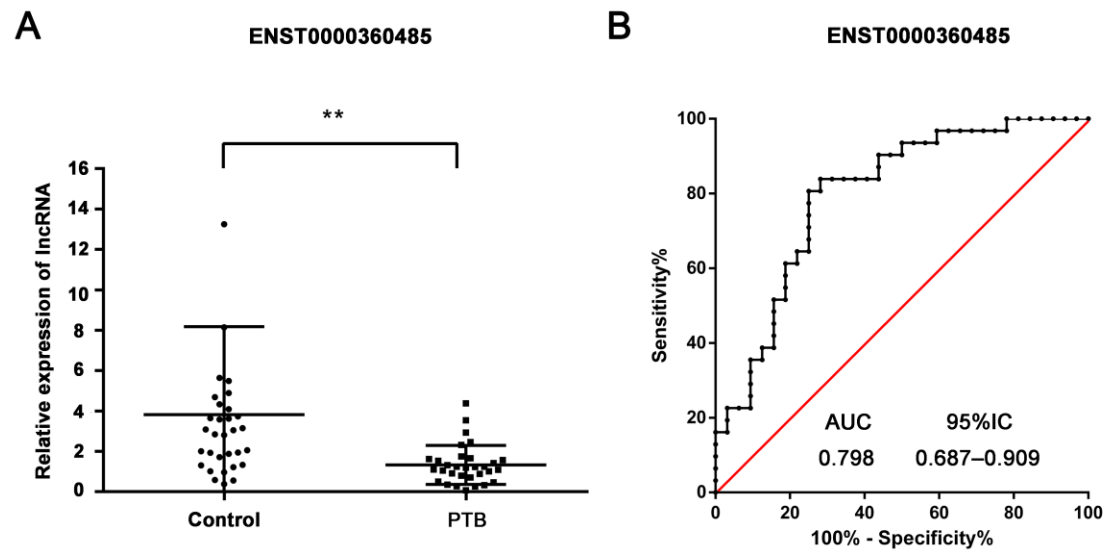

Supplementary Figure S1. Assessment of the diagnostic value of ENST00000360485 for tuberculosis. (A) qPCR result of ENST00000360485 in active pulmonary tuberculosis patients compared with healthy control. (B) Receiver operating characteristic (ROC) curve for ENST00000360485. AUC: Area under the ROC curve. \*\* $P < 0.01$ .

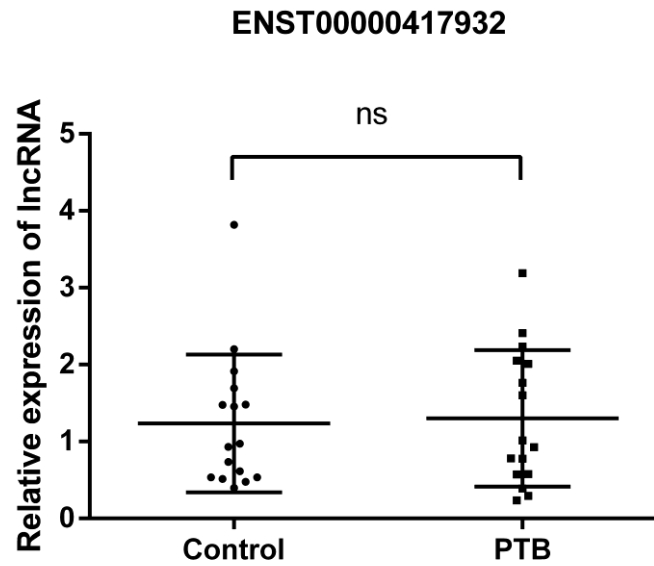

Supplementary Figure S2. Assessment of the diagnostic value of ENST00000417932 for tuberculosis. qRT-PCR result of ENST00000417932. ns indicates non-significant difference.
